# Supplementary material
Source: PubMed Central journal article supplement (PMC5378623)
Supplement: NIHMS840801-supplement-1.pdf [file NIHMS840801-supplement-1.pdf]

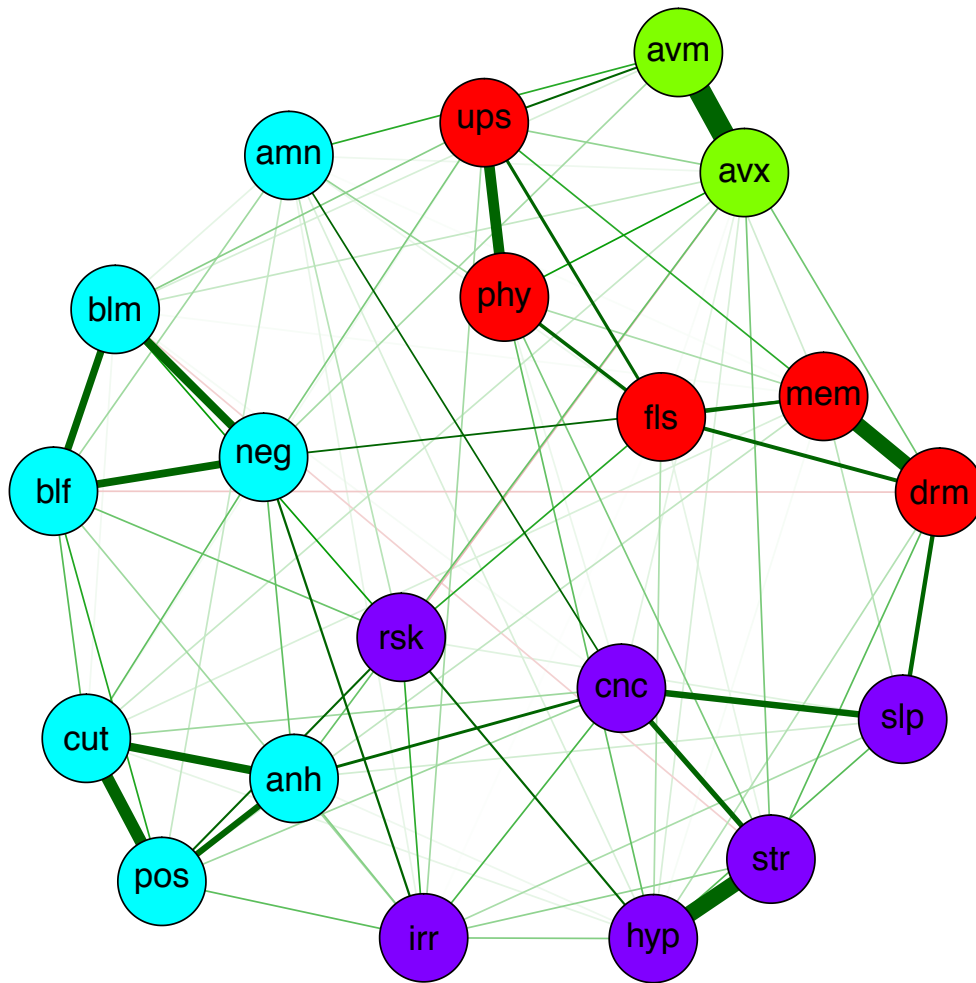

Figure 1. Graphical LASSO network of PTSD symptoms for the discovery sample.

Note. Nodes that are more highly associated with one another appear physically closer in the graph. Green lines represent positive associations, and red lines represent negative associations; the thickness of the line indicates the magnitude of a given partial correlation. PTSD = posttraumatic stress disorder; mem = intrusive distressing thoughts or memories; drm = distressing dreams; fls = dissociative flashbacks; ups = psychological distress; phy = physiological reactivity; avm = efforts to avoid thoughts or memories; avx = efforts to avoid external reminders; amn = inability to recall features of the trauma; blf = negative beliefs; blm = Distorted blaming of oneself or others; neg = persistent negative emotional state; anh = diminished interest in activities; cut = detachment from others; pos = inability to feel positive emotions; irr = irritable behavior; rsk = self-destructive or reckless behavior; hyp = hypervigilance; str = exaggerated startle response; conc = problems with concentration; slp=sleep disturbance.
