# Supplementary material
Source: PubMed Central journal article supplement (PMC5378623)
Supplement: NIHMS840801-supplement-2.pdf [file NIHMS840801-supplement-2.pdf]

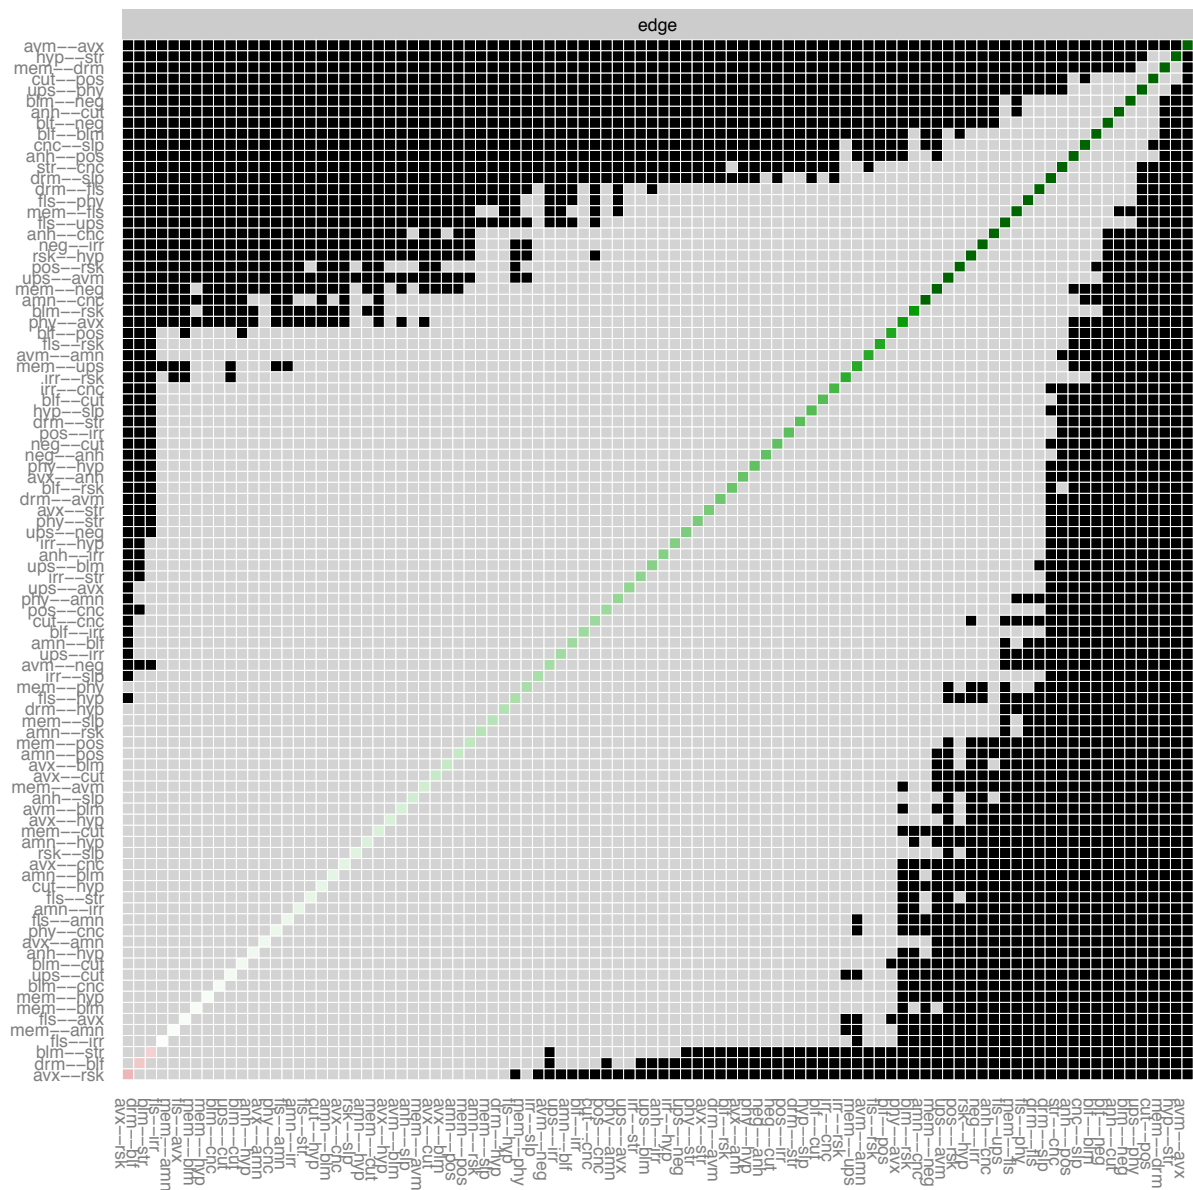

Figure 2. Confidence intervals around edges between PTSD symptoms in the graphical LASSO network.

Note. Bootstrapped difference tests between non-zero edge weights in the graphical LASSO network for the discovery sample. Gray boxes are edges that do not differ significantly from one another; black boxes represent edges that do differ significantly from one another. PTSD = posttraumatic stress disorder; mem = intrusive distressing thoughts or memories; drm = distressing dreams; fls = dissociative flashbacks; ups = psychological distress; phy = physiological reactivity; avm = efforts to avoid thoughts or memories; avx = efforts to avoid external reminders; amn = inability to recall features of the trauma; blf = negative beliefs; blm = Distorted blaming of oneself or others; neg = persistent negative emotional state; anh = diminished interest in activities; cut = detachment from others; pos = inability to feel positive

emotions; irr = irritable behavior; rsk = self-destructive or reckless behavior; hyp = hypervigilance; str = exaggerated startle response; conc = problems with concentration; slp=sleep disturbance.
