# Supplementary material
Source: PubMed Central journal article supplement (PMC5378623)
Supplement: NIHMS840801-supplement-3.pdf [file NIHMS840801-supplement-3.pdf]

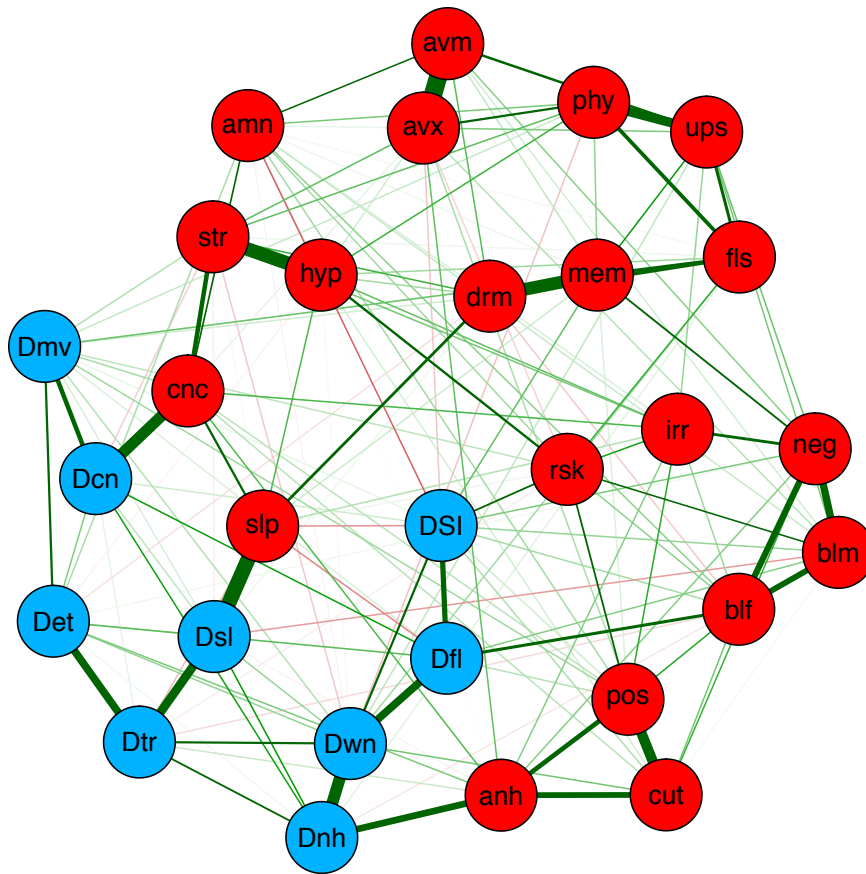

Figure 4. Graphical LASSO network of PTSD and MDD symptoms for the discovery sample.

*Note.* Nodes that are more highly associated with one another appear physically closer in the graph. Green lines represent positive associations, and red lines represent negative associations; the thickness of the line indicates the magnitude of a given partial correlation. PTSD = posttraumatic stress disorder; MDD = major depressive disorder; mem = intrusive distressing thoughts or memories; drm = distressing dreams; fls = dissociative flashbacks; ups = psychological distress; phy = physiological reactivity; avm = efforts to avoid thoughts or memories; avx = efforts to avoid external reminders; amn = Inability to recall features of the trauma; blf = negative beliefs; blm = Distorted blaming of oneself or others; neg = persistent negative emotional state; anh = diminished interest in activities; cut = detachment from others; pos = inability to feel positive emotions; irr = irritable behavior; rsk = self-destructive or reckless behavior; hyp = hypervigilance; str = exaggerated startle response; conc = problems with concentration; slp=sleep disturbance; Dnh = anhedonia (depression); Dwn = feeling down, depressed, or hopeless (depression); Dslp = sleep disturbance (depression); Dtr = feeling tired (depression); Det = poor appetite or overeating (depression); Dfl = feeling like a failure (depression); Dcn = difficulty concentrating (depression); Dmv = moving or speaking slowly or rapidly (depression); DSI = suicidal ideation (depression).
